# Supplementary material for: Effects of EPA and lipoic acid supplementation on circulating FGF21 and the fatty acid profile in overweight/obese women following a hypocaloric diet
Source: Royal Society of Chemistry journal article supplement (doi:10.1039/c8fo00355f), 2018-01-01
Supplement: c8fo00355f1.pdf [file c8fo00355f1.pdf]

**Supplementary Table 1.** Anthropometrical and biochemical characteristics of the studied cohort and their changes after 10-weeks nutritional intervention in the different groups

|                            | control<br>(n=15)  |                      | LIP<br>(n=16)      |                       | EPA<br>(n=11)      |                      | EPA+LIP<br>(n=15)   |                      |
|----------------------------|--------------------|----------------------|--------------------|-----------------------|--------------------|----------------------|---------------------|----------------------|
|                            | baseline           | endpoint             | baseline           | endpoint              | baseline           | endpoint             | baseline            | endpoint             |
| Body weight (kg)           | <b>84.4 ± 2.9</b>  | <b>79.3 ± 2.7***</b> | <b>84.0 ± 3.3</b>  | <b>76.9 ± 3.1***</b>  | <b>88.7 ± 2.7</b>  | <b>83.4 ± 3.1***</b> | <b>82.6 ± 3.3</b>   | <b>75.9 ± 2.8***</b> |
| BMI (kg/m <sup>2</sup> )   | <b>32.4 ± 1.3</b>  | <b>30.4 ± 1.2***</b> | <b>32.2 ± 1.0</b>  | <b>29.6 ± 0.9***</b>  | <b>32.3 ± 0.8</b>  | <b>30.2 ± 0.9**</b>  | <b>32.0 ± 0.9</b>   | <b>29.4 ± 0.8***</b> |
| Fat mass (kg)              | <b>38.9 ± 1.9</b>  | <b>34.8 ± 1.7***</b> | <b>39.0 ± 2.5</b>  | <b>33.4 ± 2.4***</b>  | <b>40.9 ± 1.5</b>  | <b>36.4 ± 1.7***</b> | <b>37.8 ± 2.1</b>   | <b>32.1 ± 1.7***</b> |
| Fat free mass (kg)         | <b>45.6 ± 1.5</b>  | <b>44.6 ± 1.5**</b>  | <b>45.1 ± 1.1</b>  | <b>43.5 ± 1.1***</b>  | 47.8 ± 1.5         | 46.9 ± 1.7           | <b>44.7 ± 1.4</b>   | <b>43.8 ± 1.4*</b>   |
| Total Cholesterol (mg/dL)  | <b>192.5 ± 9.6</b> | <b>181.9 ± 9.7*</b>  | <b>194.5 ± 6.9</b> | <b>167.9 ± 7.2***</b> | <b>184.0 ± 9.9</b> | <b>166.4 ± 10.1*</b> | <b>199.5 ± 10.8</b> | <b>180.0 ± 9.8**</b> |
| Triglycerides (mg/dL)      | 85.5 ± 10.6        | 74.1 ± 7.6           | 97.5 ± 13.1        | 78.2 ± 7.9            | 86.4 ± 10.0        | 76.5 ± 13.3          | <b>85.3 ± 11.1</b>  | <b>69.1 ± 7.8*</b>   |
| FFAs (mmol/L)              | 0.51 ± 0.1         | 0.52 ± 0.1           | 0.53 ± 0.1         | 0.50 ± 0.0            | <b>0.51 ± 0.0</b>  | <b>0.59 ± 0.0*</b>   | 0.58 ± 0.0          | 0.61 ± 0.1           |
| β-hydroxybutyrate (mmol/L) | 0.4 ± 0.1          | 0.3 ± 0.1            | 0.4 ± 0.1          | 0.4 ± 0.1             | <b>0.2 ± 0.1</b>   | <b>0.5 ± 0.1*</b>    | 0.3 ± 2.4           | 0.4 ± 0.1            |
| Glucose (mg/dL)            | <b>91.5 ± 1.9</b>  | <b>87.3 ± 1.3**</b>  | 89.46 ± 2.0        | 89.6 ± 2.0            | 89.5 ± 2.1         | 87.9 ± 2.9           | <b>94.4 ± 2.4</b>   | <b>90.2 ± 2.1**</b>  |
| Insulin (mU/L)             | <b>9.2 ± 2.3</b>   | <b>5.8 ± 1.0*</b>    | <b>7.2 ± 0.8</b>   | <b>4.9 ± 0.7*</b>     | 6.7 ± 1.2          | 6.6 ± 1.6            | <b>10.3 ± 2.5</b>   | <b>6.5 ± 1.6***</b>  |
| HOMA-IR                    | <b>2.0 ± 0.5</b>   | <b>1.2 ± 0.2**</b>   | <b>1.5 ± 0.2</b>   | <b>1.1 ± 0.1*</b>     | 1.5 ± 0.3          | 1.4 ± 0.4            | <b>2.3 ± 0.6</b>    | <b>1.4 ± 0.4***</b>  |
| AST (IU/L)                 | 15.7 ± 0.8         | 14.9 ± 0.7           | 14.5 ± 0.8         | 18.2 ± 1.56           | 19.9 ± 1.7         | 16.2 ± 1.1           | 18.2 ± 1.2          | 16.2 ± 0.9           |
| ALT (IU/L)                 | <b>19.0 ± 2.0</b>  | <b>15.1 ± 1.3*</b>   | <b>15.1 ± 1.6</b>  | <b>21.6 ± 3.18*</b>   | 23.7 ± 4.4         | 20.37 ± 2.5          | 18.8 ± 1.5          | 17.8 ± 2.2           |
| AST/ALT ratio              | <b>0.9 ± 0.1</b>   | <b>1.1 ± 0.1**</b>   | <b>1.0 ± 0.1</b>   | <b>1.0 ± 0.1***</b>   | <b>1.0 ± 0.1</b>   | <b>0.9 ± 0.1**</b>   | <b>1.0 ± 0.1</b>    | <b>1.0 ± 0.1***</b>  |
| Leptin (ng/mL)             | <b>24.2 ± 1.8</b>  | <b>17.3 ± 1.8***</b> | <b>22.6 ± 2.4</b>  | <b>13.7 ± 1.8***</b>  | 19.4 ± 2.1         | 18.7 ± 2.0           | <b>18.9 ± 1.5</b>   | <b>14.6 ± 1.6**</b>  |
| Adiponectin (µg/mL)        | 13.9 ± 1.6         | 13.9 ± 1.5           | 12.5 ± 0.6         | 11.9 ± 0.8            | <b>11.7 ± 1.1</b>  | <b>11.1 ± 1.2*</b>   | 13.8 ± 1.1          | 12.3 ± 1.0           |
| HMW adiponectin (µg/mL)    | 2.4 ± 0.4          | 2.3 ± 0.4            | 2.1 ± 0.3          | 1.8 ± 0.2             | 2.3 ± 0.5          | 1.9 ± 0.4            | 2.0 ± 0.2           | 2.0 ± 0.2            |
| HMW / total adiponectin    | 0.2 ± 0.0          | 0.2 ± 0.0            | 0.2 ± 0.0          | 0.2 ± 0.0             | 0.2 ± 0.0          | 0.2 ± 0.0            | 0.2 ± 0.0           | 0.2 ± 0.0            |
| FGF21 (pg/mL)              | 287.4 ± 20.5       | 252.4 ± 27.7         | 306.9 ± 23.6       | 295.1 ± 22.6          | 280.4 ± 26.8       | 288.4 ± 17.7         | 273.1 ± 25.0        | 287.5 ± 25.4         |

Data are means ± SEM. \**P*<0.05, \*\**P*<0.01, \*\*\**P*<0.001 vs. basal levels. Analysis was performed with paired *t* test (for variables with normal distribution) and Wilcoxon's test (for variables with non-normal distribution). LIP, lipoic acid; EPA, eicosapentaenoic acid.
